# Supplementary material
Source: HighWire-hosted journal article supplement (https://ard.bmj.com/content/80/1/36)
Supplement: inline-supplementary-material-3 [file inline-supplementary-material-3.xlsx]

## Sheet: Feuil1
Supplementary Table S2. EULAR recommendations on the target maintenance dose of glucocorticoids (GCs) in classical RMDs
Sjögren’s syndrome	2019	final target of withdrawing GCs in inactive patients as soon as possible or at least trying to target a maintenance dose of 5mg/daily or less with the aid of GC-sparing immunosuppressive agents
Rheumatoid arthritis	2019	low-dose=7.5mg/day (prednisone equivalent). Aiming at discontinuation within about 3 months
Systemic lupus erythematosus	2019	for chronic maintenance treatment, GCs should be minimised to less than 7.5 mg/day (prednisone equivalent), and, when possible, withdrawn.
Large-vessel vasculitis	2018	target dose of 15–20 mg/day within 2–3 months and after 1 year to ≤5 mg/day (for giant cell arteritis) and to ≤10 mg/day (for Takayasu arteritis)
Psoriatic arthrits	2015	long-term use of systemic glucocorticoids should be avoided based on the significant risks of adverse events and in particular the adverse event profile of longer-term glucocorticoid therapy needs to be taken into consideration when initiating and especially continuing oral glucocorticoids.
Polymyalgia rheumatica	2015	taper dose to an oral dose of 10 mg/day prednisone equivalent within 4–8 weeks. low-dose range: prednisone or equivalent <5 mg daily).
